# Supplementary material
Source: publisher figshare collection journal article supplement (https://plos.figshare.com/articles/dataset/_/4236794)
Supplement: Supplementary file [file 1]

**S2 Table. The number of paired length-age measurements by area and quarter.**

| Quarter | Area    | Model Estimation |                  |        | Observed Values  |        |      |
|---------|---------|------------------|------------------|--------|------------------|--------|------|
|         |         | Age (years)      | Mean Length (cm) | SE     | Mean Length (cm) | sd     | N    |
| 2       | SCA_ON  | 0                | 13.56            | 0.0412 | 13.45            | 1.0326 | 2042 |
| 2       | SCA_ON  | 1                | 14.91            | 0.0424 | 14.88            | 1.1016 | 1603 |
| 2       | SCA_ON  | 2                | 15.67            | 0.0946 | 15.54            | 1.4170 | 233  |
| 2       | SCA_ON  | 3                |                  |        |                  |        |      |
| 2       | SCA_ON  | 4                |                  |        |                  |        |      |
| 2       | SCA_ON  | 5                |                  |        |                  |        |      |
| 2       | SCA_ON  | 6                |                  |        |                  |        |      |
| 2       | SCA_ON  | 7                |                  |        |                  |        |      |
| 2       | CCA_ON  | 0                | 13.54            | 0.0708 | 13.20            | 2.4005 | 482  |
| 2       | CCA_ON  | 1                | 16.02            | 0.0761 | 15.77            | 1.7583 | 396  |
| 2       | CCA_ON  | 2                | 17.78            | 0.0666 | 17.79            | 1.5449 | 546  |
| 2       | CCA_ON  | 3                | 19.50            | 0.1094 | 19.59            | 1.3814 | 180  |
| 2       | CCA_ON  | 4                | 21.30            | 0.2840 | 21.32            | 1.6258 | 25   |
| 2       | CCA_ON  | 5                |                  |        |                  |        |      |
| 2       | CCA_ON  | 6                |                  |        |                  |        |      |
| 2       | CCA_ON  | 7                |                  |        |                  |        |      |
| 2       | SCA_OFF | 0                |                  |        |                  |        |      |
| 2       | SCA_OFF | 1                | 14.27            | 0.2956 | 14.30            | 1.4596 | 23   |
| 2       | SCA_OFF | 2                | 16.53            | 0.1698 | 16.63            | 2.0992 | 72   |
| 2       | SCA_OFF | 3                | 20.33            | 0.1028 | 20.58            | 1.6777 | 215  |
| 2       | SCA_OFF | 4                | 20.92            | 0.1437 | 21.24            | 1.2486 | 132  |
| 2       | SCA_OFF | 5                | 21.10            | 0.2426 | 21.41            | 1.3008 | 37   |
| 2       | SCA_OFF | 6                |                  |        |                  |        |      |
| 2       | SCA_OFF | 7                |                  |        |                  |        |      |
| 2       | CCA_OFF | 0                |                  |        |                  |        |      |
| 2       | CCA_OFF | 1                |                  |        |                  |        |      |
| 2       | CCA_OFF | 2                | 18.23            | 0.2126 | 18.18            | 2.3864 | 45   |
| 2       | CCA_OFF | 3                | 21.69            | 0.1344 | 21.58            | 2.3358 | 115  |
| 2       | CCA_OFF | 4                | 22.42            | 0.1134 | 22.29            | 1.7741 | 169  |
| 2       | CCA_OFF | 5                | 22.61            | 0.2272 | 22.49            | 1.7751 | 39   |
| 2       | CCA_OFF | 6                |                  |        |                  |        |      |
| 2       | CCA_OFF | 7                |                  |        |                  |        |      |
| 3       | CANADA  | 0                |                  |        |                  |        |      |
| 3       | CANADA  | 1                | 16.17            | 0.1425 | 15.27            | 2.6858 | 74   |

|         |        | Model Estimation |                        |        | Observed Values        |        |      |
|---------|--------|------------------|------------------------|--------|------------------------|--------|------|
| Quarter | Area   | Age<br>(years)   | Mean<br>Length<br>(cm) | SE     | Mean<br>Length<br>(cm) | sd     | N    |
| 3       | CANADA | 2                | 19.31                  | 0.0866 | 19.12                  | 1.2613 | 214  |
| 3       | CANADA | 3                | 20.70                  | 0.0566 | 20.26                  | 1.3571 | 499  |
| 3       | CANADA | 4                | 21.46                  | 0.0414 | 21.00                  | 1.2467 | 952  |
| 3       | CANADA | 5                | 22.01                  | 0.0376 | 21.69                  | 1.2993 | 1175 |
| 3       | CANADA | 6                | 22.64                  | 0.0515 | 22.50                  | 1.3498 | 589  |
| 3       | CANADA | 7                | 23.01                  | 0.0657 | 22.90                  | 1.3439 | 362  |
| 3       | CANADA | 8                | 23.52                  | 0.1404 | 23.61                  | 1.2400 | 75   |
| 3       | CANADA | 9                | 23.99                  | 0.2705 | 24.10                  | 1.4832 | 20   |
| 3       | CANADA | 10               |                        |        |                        |        |      |
| 3       | CANADA | 11               |                        |        |                        |        |      |
| 3       | CANADA | 12               |                        |        |                        |        |      |
| 3       | SCA    | 0                |                        |        |                        |        |      |
| 3       | SCA    | 1                |                        |        |                        |        |      |
| 3       | SCA    | 2                |                        |        |                        |        |      |
| 3       | SCA    | 3                |                        |        |                        |        |      |
| 3       | SCA    | 4                |                        |        |                        |        |      |
| 3       | SCA    | 5                |                        |        |                        |        |      |
| 3       | SCA    | 6                |                        |        |                        |        |      |
| 3       | SCA    | 7                |                        |        |                        |        |      |
| 3       | SCA    | 8                |                        |        |                        |        |      |
| 3       | SCA    | 9                |                        |        |                        |        |      |
| 3       | SCA    | 10               |                        |        |                        |        |      |
| 3       | SCA    | 11               |                        |        |                        |        |      |
| 3       | SCA    | 12               |                        |        |                        |        |      |
| 3       | CCA    | 0                | 13.41                  | 0.1186 | 13.24                  | 2.3920 | 105  |
| 3       | CCA    | 1                | 15.68                  | 0.0272 | 15.28                  | 1.3632 | 2561 |
| 3       | CCA    | 2                | 17.30                  | 0.0254 | 17.32                  | 1.4548 | 3336 |
| 3       | CCA    | 3                | 18.11                  | 0.0472 | 17.91                  | 1.2768 | 787  |
| 3       | CCA    | 4                | 18.72                  | 0.1315 | 18.85                  | 1.8896 | 87   |
| 3       | CCA    | 5                |                        |        |                        |        |      |
| 3       | CCA    | 6                |                        |        |                        |        |      |
| 3       | CCA    | 7                |                        |        |                        |        |      |
| 3       | CCA    | 8                |                        |        |                        |        |      |
| 3       | CCA    | 9                |                        |        |                        |        |      |
| 3       | CCA    | 10               |                        |        |                        |        |      |
| 3       | CCA    | 11               |                        |        |                        |        |      |

|         |        | Model Estimation |                        |        | Observed Values        |        |      |
|---------|--------|------------------|------------------------|--------|------------------------|--------|------|
| Quarter | Area   | Age<br>(years)   | Mean<br>Length<br>(cm) | SE     | Mean<br>Length<br>(cm) | sd     | N    |
| 3       | CCA    | 12               |                        |        |                        |        |      |
| 3       | ORWA   | 0                |                        |        |                        |        |      |
| 3       | ORWA   | 1                | 16.08                  | 0.0615 | 16.89                  | 2.2354 | 452  |
| 3       | ORWA   | 2                | 18.29                  | 0.0317 | 18.58                  | 1.8388 | 1813 |
| 3       | ORWA   | 3                | 19.68                  | 0.0226 | 19.73                  | 1.3934 | 4304 |
| 3       | ORWA   | 4                | 20.29                  | 0.0210 | 20.14                  | 1.4359 | 5412 |
| 3       | ORWA   | 5                | 20.82                  | 0.0234 | 20.65                  | 1.5636 | 3832 |
| 3       | ORWA   | 6                | 21.29                  | 0.0305 | 21.27                  | 1.6711 | 1946 |
| 3       | ORWA   | 7                | 21.72                  | 0.0463 | 21.94                  | 1.6329 | 746  |
| 3       | ORWA   | 8                | 22.29                  | 0.0692 | 22.74                  | 1.4219 | 319  |
| 3       | ORWA   | 9                | 22.63                  | 0.0949 | 23.05                  | 1.3300 | 167  |
| 3       | ORWA   | 10               | 22.90                  | 0.1519 | 23.44                  | 1.2956 | 64   |
| 3       | ORWA   | 11               | 23.02                  | 0.1872 | 23.36                  | 1.1438 | 42   |
| 3       | ORWA   | 12               | 23.41                  | 0.2474 | 23.54                  | 0.9771 | 24   |
| 4       | CANADA | 0                |                        |        |                        |        |      |
| 4       | CANADA | 1                |                        |        |                        |        |      |
| 4       | CANADA | 2                |                        |        |                        |        |      |
| 4       | CANADA | 3                | 20.05                  | 0.2626 | 19.76                  | 1.7626 | 25   |
| 4       | CANADA | 4                | 22.55                  | 0.1746 | 22.17                  | 1.0619 | 58   |
| 4       | CANADA | 5                | 23.23                  | 0.1538 | 22.80                  | 0.6737 | 76   |
| 4       | CANADA | 6                | 23.96                  | 0.1553 | 23.36                  | 0.7688 | 74   |
| 4       | CANADA | 7                | 24.62                  | 0.1698 | 23.66                  | 0.6258 | 62   |
| 4       | CANADA | 8                | 25.00                  | 0.2929 | 23.85                  | 0.7452 | 20   |
| 4       | SCA    | 0                | 13.57                  | 0.0597 | 12.21                  | 1.4530 | 645  |
| 4       | SCA    | 1                | 16.37                  | 0.0363 | 15.37                  | 1.9041 | 2009 |
| 4       | SCA    | 2                | 17.65                  | 0.0407 | 17.34                  | 2.1331 | 1302 |
| 4       | SCA    | 3                | 18.26                  | 0.0708 | 18.06                  | 1.9861 | 422  |
| 4       | SCA    | 4                | 19.52                  | 0.1731 | 19.58                  | 2.2035 | 57   |
| 4       | SCA    | 5                |                        |        |                        |        |      |
| 4       | SCA    | 6                |                        |        |                        |        |      |
| 4       | SCA    | 7                |                        |        |                        |        |      |
| 4       | SCA    | 8                |                        |        |                        |        |      |
| 4       | CCA    | 0                | 14.45                  | 0.0965 | 13.96                  | 2.4492 | 220  |
| 4       | CCA    | 1                | 16.69                  | 0.0413 | 15.35                  | 1.3972 | 2253 |
| 4       | CCA    | 2                | 18.74                  | 0.0412 | 17.33                  | 1.4494 | 2371 |
| 4       | CCA    | 3                | 20.20                  | 0.0537 | 19.35                  | 1.6792 | 972  |

|         |      | Model Estimation |                  |        | Observed Values  |        |     |
|---------|------|------------------|------------------|--------|------------------|--------|-----|
| Quarter | Area | Age (years)      | Mean Length (cm) | SE     | Mean Length (cm) | sd     | N   |
| 4       | CCA  | 4                | 21.69            | 0.0947 | 21.11            | 1.7569 | 215 |
| 4       | CCA  | 5                | 23.00            | 0.1608 | 22.51            | 1.5692 | 68  |
| 4       | CCA  | 6                |                  |        |                  |        |     |
| 4       | CCA  | 7                |                  |        |                  |        |     |
| 4       | CCA  | 8                |                  |        |                  |        |     |
| 4       | ORWA | 0                |                  |        |                  |        |     |
| 4       | ORWA | 1                | 17.46            | 0.1123 | 16.36            | 2.1377 | 166 |
| 4       | ORWA | 2                | 19.80            | 0.1214 | 18.71            | 2.1707 | 124 |
| 4       | ORWA | 3                | 20.68            | 0.1060 | 19.58            | 2.0005 | 165 |
| 4       | ORWA | 4                | 21.66            | 0.1190 | 21.02            | 1.7426 | 135 |
| 4       | ORWA | 5                | 22.25            | 0.1353 | 21.63            | 1.2225 | 101 |
| 4       | ORWA | 6                | 22.89            | 0.1505 | 22.15            | 1.0803 | 80  |
| 4       | ORWA | 7                | 23.74            | 0.2433 | 23.03            | 0.9814 | 29  |
| 4       | ORWA | 8                |                  |        |                  |        |     |

Empirical mean length-at-age and standard deviation along with model estimated mean age and standard error are given. Length bins with 20 or fewer fish were not included in the analysis.
