# Supplementary material
Source: publisher figshare collection journal article supplement (https://plos.figshare.com/articles/dataset/_/4236794)
Supplement: Supplementary file [file 1]

**S1 Table. Paired age-length measurements by area and quarter.**

| Quarter | Area    | Model Estimation |                  |        | Observed Values  |        |      |
|---------|---------|------------------|------------------|--------|------------------|--------|------|
|         |         | Length (cm)      | Mean Age (years) | SE     | Mean Age (years) | sd     | N    |
| 2       | SCA_ON  | 10               |                  |        |                  |        |      |
| 2       | SCA_ON  | 11               | 0.16             | 0.0788 | 0.00             | 0.0000 | 52   |
| 2       | SCA_ON  | 12               | 0.19             | 0.0375 | 0.05             | 0.2268 | 244  |
| 2       | SCA_ON  | 13               | 0.36             | 0.0210 | 0.19             | 0.4196 | 1000 |
| 2       | SCA_ON  | 14               | 0.55             | 0.0193 | 0.46             | 0.5720 | 1098 |
| 2       | SCA_ON  | 15               | 0.77             | 0.0217 | 0.77             | 0.5824 | 824  |
| 2       | SCA_ON  | 16               | 1.04             | 0.0277 | 1.04             | 0.4486 | 513  |
| 2       | SCA_ON  | 17               | 1.30             | 0.0528 | 1.31             | 0.5152 | 120  |
| 2       | SCA_ON  | 18               | 1.98             | 0.1205 | 2.00             | 0.6901 | 22   |
| 2       | SCA_ON  | 19               |                  |        |                  |        |      |
| 2       | SCA_ON  | 20               |                  |        |                  |        |      |
| 2       | SCA_ON  | 21               |                  |        |                  |        |      |
| 2       | SCA_ON  | 22               |                  |        |                  |        |      |
| 2       | SCA_ON  | 23               |                  |        |                  |        |      |
| 2       | SCA_ON  | 24               |                  |        |                  |        |      |
| 2       | SCA_ON  | 25               |                  |        |                  |        |      |
| 2       | SCA_ON  | 26               |                  |        |                  |        |      |
| 2       | CCA_ON  | 10               | 0.03             | 0.0852 | 0.02             | 0.1474 | 46   |
| 2       | CCA_ON  | 11               | 0.07             | 0.0523 | 0.07             | 0.2512 | 134  |
| 2       | CCA_ON  | 12               | 0.11             | 0.0864 | 0.11             | 0.3210 | 44   |
| 2       | CCA_ON  | 13               | 0.20             | 0.0945 | 0.19             | 0.4014 | 36   |
| 2       | CCA_ON  | 14               | 0.64             | 0.0510 | 0.63             | 0.7102 | 134  |
| 2       | CCA_ON  | 15               | 0.76             | 0.0379 | 0.75             | 0.7103 | 259  |
| 2       | CCA_ON  | 16               | 0.99             | 0.0458 | 0.96             | 0.7191 | 163  |
| 2       | CCA_ON  | 17               | 1.62             | 0.0419 | 1.57             | 0.6431 | 205  |
| 2       | CCA_ON  | 18               | 2.03             | 0.0399 | 1.97             | 0.5315 | 227  |
| 2       | CCA_ON  | 19               | 2.26             | 0.0444 | 2.22             | 0.5761 | 175  |
| 2       | CCA_ON  | 20               | 2.44             | 0.0534 | 2.45             | 0.9540 | 119  |
| 2       | CCA_ON  | 21               | 2.65             | 0.0768 | 2.70             | 0.9056 | 57   |
| 2       | CCA_ON  | 22               | 2.96             | 0.1416 | 3.00             | 1.2111 | 16   |
| 2       | CCA_ON  | 23               |                  |        |                  |        |      |
| 2       | CCA_ON  | 24               |                  |        |                  |        |      |
| 2       | CCA_ON  | 25               |                  |        |                  |        |      |
| 2       | CCA_ON  | 26               |                  |        |                  |        |      |
| 2       | SCA_OFF | 10               |                  |        |                  |        |      |

|         |         | Model Estimation |                  |        | Observed Values  |        |     |
|---------|---------|------------------|------------------|--------|------------------|--------|-----|
| Quarter | Area    | Length (cm)      | Mean Age (years) | SE     | Mean Age (years) | sd     | N   |
| 2       | SCA_OFF | 11               |                  |        |                  |        |     |
| 2       | SCA_OFF | 12               |                  |        |                  |        |     |
| 2       | SCA_OFF | 13               | 1.30             | 0.1712 | 1.45             | 0.9342 | 11  |
| 2       | SCA_OFF | 14               | 1.32             | 0.1378 | 1.47             | 0.7174 | 17  |
| 2       | SCA_OFF | 15               | 1.43             | 0.1633 | 1.58             | 0.7930 | 12  |
| 2       | SCA_OFF | 16               | 1.97             | 0.1272 | 2.10             | 0.7182 | 20  |
| 2       | SCA_OFF | 17               | 2.08             | 0.1139 | 2.16             | 0.6245 | 25  |
| 2       | SCA_OFF | 18               | 2.71             | 0.1238 | 2.67             | 0.7303 | 21  |
| 2       | SCA_OFF | 19               | 3.00             | 0.0961 | 2.97             | 0.6636 | 35  |
| 2       | SCA_OFF | 20               | 3.11             | 0.0765 | 3.33             | 0.6713 | 72  |
| 2       | SCA_OFF | 21               | 3.47             | 0.0569 | 3.66             | 0.7038 | 134 |
| 2       | SCA_OFF | 22               | 3.43             | 0.0604 | 3.59             | 0.7826 | 99  |
| 2       | SCA_OFF | 23               | 3.47             | 0.1103 | 3.63             | 0.6877 | 27  |
| 2       | SCA_OFF | 24               |                  |        |                  |        |     |
| 2       | SCA_OFF | 25               |                  |        |                  |        |     |
| 2       | SCA_OFF | 26               |                  |        |                  |        |     |
| 2       | CCA_OFF | 10               |                  |        |                  |        |     |
| 2       | CCA_OFF | 11               |                  |        |                  |        |     |
| 2       | CCA_OFF | 12               |                  |        |                  |        |     |
| 2       | CCA_OFF | 13               |                  |        |                  |        |     |
| 2       | CCA_OFF | 14               |                  |        |                  |        |     |
| 2       | CCA_OFF | 15               |                  |        |                  |        |     |
| 2       | CCA_OFF | 16               | 1.67             | 0.1510 | 1.71             | 0.6112 | 14  |
| 2       | CCA_OFF | 17               | 1.93             | 0.1187 | 2.04             | 0.8245 | 23  |
| 2       | CCA_OFF | 18               | 2.31             | 0.1190 | 2.43             | 0.8958 | 23  |
| 2       | CCA_OFF | 19               |                  |        |                  |        |     |
| 2       | CCA_OFF | 20               | 3.60             | 0.1061 | 3.59             | 0.6278 | 29  |
| 2       | CCA_OFF | 21               | 3.76             | 0.0645 | 3.73             | 0.7171 | 83  |
| 2       | CCA_OFF | 22               | 3.84             | 0.0615 | 3.82             | 0.7971 | 91  |
| 2       | CCA_OFF | 23               | 3.84             | 0.0819 | 3.82             | 0.6974 | 49  |
| 2       | CCA_OFF | 24               | 4.01             | 0.1230 | 3.90             | 0.9952 | 21  |
| 2       | CCA_OFF | 25               | 4.41             | 0.1095 | 4.11             | 1.0500 | 27  |
| 2       | CCA_OFF | 26               | 4.38             | 0.1417 | 4.06             | 0.9287 | 16  |
| 3       | CANADA  | 10               |                  |        |                  |        |     |
| 3       | CANADA  | 11               |                  |        |                  |        |     |
| 3       | CANADA  | 12               |                  |        |                  |        |     |
| 3       | CANADA  | 13               | 0.00             | 0.1076 | 1.00             | 0.0000 | 24  |

|         |        | Model Estimation |                  |        | Observed Values  |        |      |
|---------|--------|------------------|------------------|--------|------------------|--------|------|
| Quarter | Area   | Length (cm)      | Mean Age (years) | SE     | Mean Age (years) | sd     | N    |
| 3       | CANADA | 14               | 0.00             | 0.1298 | 1.00             | 0.0000 | 27   |
| 3       | CANADA | 15               |                  |        |                  |        |      |
| 3       | CANADA | 16               |                  |        |                  |        |      |
| 3       | CANADA | 17               |                  |        |                  |        |      |
| 3       | CANADA | 18               | 2.79             | 0.1146 | 2.52             | 0.9259 | 87   |
| 3       | CANADA | 19               | 3.29             | 0.0562 | 3.19             | 1.1244 | 388  |
| 3       | CANADA | 20               | 3.81             | 0.0439 | 4.04             | 1.0356 | 648  |
| 3       | CANADA | 21               | 4.17             | 0.0371 | 4.72             | 1.1122 | 938  |
| 3       | CANADA | 22               | 4.63             | 0.0417 | 4.90             | 1.1912 | 696  |
| 3       | CANADA | 23               | 5.62             | 0.0433 | 5.43             | 1.0388 | 649  |
| 3       | CANADA | 24               | 6.25             | 0.0542 | 6.00             | 1.2384 | 402  |
| 3       | CANADA | 25               | 7.16             | 0.1162 | 6.88             | 1.3471 | 83   |
| 3       | CANADA | 26               |                  |        |                  |        |      |
| 3       | SCA    | 10               |                  |        |                  |        |      |
| 3       | SCA    | 11               |                  |        |                  |        |      |
| 3       | SCA    | 12               |                  |        |                  |        |      |
| 3       | SCA    | 13               |                  |        |                  |        |      |
| 3       | SCA    | 14               |                  |        |                  |        |      |
| 3       | SCA    | 15               |                  |        |                  |        |      |
| 3       | SCA    | 16               |                  |        |                  |        |      |
| 3       | SCA    | 17               |                  |        |                  |        |      |
| 3       | SCA    | 18               |                  |        |                  |        |      |
| 3       | SCA    | 19               |                  |        |                  |        |      |
| 3       | SCA    | 20               |                  |        |                  |        |      |
| 3       | SCA    | 21               |                  |        |                  |        |      |
| 3       | SCA    | 22               |                  |        |                  |        |      |
| 3       | SCA    | 23               |                  |        |                  |        |      |
| 3       | SCA    | 24               |                  |        |                  |        |      |
| 3       | SCA    | 25               |                  |        |                  |        |      |
| 3       | SCA    | 26               |                  |        |                  |        |      |
| 3       | CCA    | 10               |                  |        |                  |        |      |
| 3       | CCA    | 11               | 0.57             | 0.2634 | 0.38             | 0.5000 | 16   |
| 3       | CCA    | 12               | 0.59             | 0.1392 | 0.66             | 0.5148 | 58   |
| 3       | CCA    | 13               | 0.96             | 0.0826 | 0.93             | 0.3177 | 171  |
| 3       | CCA    | 14               | 1.11             | 0.0454 | 1.04             | 0.2843 | 610  |
| 3       | CCA    | 15               | 1.06             | 0.0364 | 1.24             | 0.4780 | 925  |
| 3       | CCA    | 16               | 1.24             | 0.0296 | 1.61             | 0.6035 | 1454 |

|         |        | Model Estimation |                  |        | Observed Values  |        |      |
|---------|--------|------------------|------------------|--------|------------------|--------|------|
| Quarter | Area   | Length (cm)      | Mean Age (years) | SE     | Mean Age (years) | sd     | N    |
| 3       | CCA    | 17               | 1.54             | 0.0286 | 1.94             | 0.6377 | 1693 |
| 3       | CCA    | 18               | 1.78             | 0.0378 | 2.20             | 0.6322 | 1031 |
| 3       | CCA    | 19               | 2.08             | 0.0569 | 2.38             | 0.6448 | 444  |
| 3       | CCA    | 20               | 2.23             | 0.0785 | 2.21             | 0.5277 | 344  |
| 3       | CCA    | 21               | 2.41             | 0.1209 | 2.35             | 0.6748 | 99   |
| 3       | CCA    | 22               |                  |        |                  |        |      |
| 3       | CCA    | 23               |                  |        |                  |        |      |
| 3       | CCA    | 24               |                  |        |                  |        |      |
| 3       | CCA    | 25               |                  |        |                  |        |      |
| 3       | CCA    | 26               |                  |        |                  |        |      |
| 3       | ORWA   | 10               |                  |        |                  |        |      |
| 3       | ORWA   | 11               |                  |        |                  |        |      |
| 3       | ORWA   | 12               |                  |        |                  |        |      |
| 3       | ORWA   | 13               | 1.79             | 0.1716 | 1.13             | 0.3426 | 38   |
| 3       | ORWA   | 14               | 1.88             | 0.1381 | 1.37             | 0.5219 | 59   |
| 3       | ORWA   | 15               | 1.96             | 0.1380 | 1.56             | 0.7015 | 59   |
| 3       | ORWA   | 16               | 2.21             | 0.0776 | 1.90             | 0.6388 | 197  |
| 3       | ORWA   | 17               | 2.46             | 0.0424 | 2.20             | 0.8926 | 717  |
| 3       | ORWA   | 18               | 3.05             | 0.0270 | 3.26             | 1.1475 | 1833 |
| 3       | ORWA   | 19               | 3.52             | 0.0205 | 3.94             | 1.1328 | 4262 |
| 3       | ORWA   | 20               | 3.91             | 0.0205 | 4.13             | 1.2185 | 4163 |
| 3       | ORWA   | 21               | 4.38             | 0.0235 | 4.12             | 1.2532 | 3019 |
| 3       | ORWA   | 22               | 5.22             | 0.0259 | 4.82             | 1.5232 | 2504 |
| 3       | ORWA   | 23               | 6.03             | 0.0306 | 5.65             | 1.7601 | 1535 |
| 3       | ORWA   | 24               | 7.02             | 0.0460 | 6.67             | 2.1011 | 582  |
| 3       | ORWA   | 25               | 7.34             | 0.0896 | 7.03             | 2.2455 | 141  |
| 3       | ORWA   | 26               | 8.32             | 0.2481 | 8.06             | 2.4125 | 18   |
| 4       | CANADA | 10               |                  |        |                  |        |      |
| 4       | CANADA | 11               |                  |        |                  |        |      |
| 4       | CANADA | 12               |                  |        |                  |        |      |
| 4       | CANADA | 13               |                  |        |                  |        |      |
| 4       | CANADA | 14               |                  |        |                  |        |      |
| 4       | CANADA | 15               |                  |        |                  |        |      |
| 4       | CANADA | 16               |                  |        |                  |        |      |
| 4       | CANADA | 17               |                  |        |                  |        |      |
| 4       | CANADA | 18               | 2.91             | 0.1893 | 2.50             | 0.5222 | 12   |
| 4       | CANADA | 19               | 3.43             | 0.1816 | 3.08             | 0.6405 | 13   |

|         |        | Model Estimation |                  |        | Observed Values  |        |      |
|---------|--------|------------------|------------------|--------|------------------|--------|------|
| Quarter | Area   | Length (cm)      | Mean Age (years) | SE     | Mean Age (years) | sd     | N    |
| 4       | CANADA | 20               |                  |        |                  |        |      |
| 4       | CANADA | 21               |                  |        |                  |        |      |
| 4       | CANADA | 22               | 4.76             | 0.0837 | 4.52             | 0.868  | 65   |
| 4       | CANADA | 23               | 5.88             | 0.0612 | 5.65             | 1.1197 | 130  |
| 4       | CANADA | 24               | 6.64             | 0.0751 | 6.48             | 1.0089 | 82   |
| 4       | CANADA | 25               | 7.41             | 0.1888 | 7.25             | 0.9653 | 12   |
| 4       | CANADA | 26               |                  |        |                  |        |      |
| 4       | SCA    | 10               | 0.00             | 0.0857 | 0.00             | 0      | 46   |
| 4       | SCA    | 11               | 0.00             | 0.0196 | 0.07             | 0.2632 | 188  |
| 4       | SCA    | 12               | 0.00             | 0.0260 | 0.24             | 0.4274 | 226  |
| 4       | SCA    | 13               | 0.37             | 0.0374 | 0.75             | 0.5718 | 421  |
| 4       | SCA    | 14               | 0.55             | 0.0342 | 0.93             | 0.5022 | 511  |
| 4       | SCA    | 15               | 1.01             | 0.0304 | 1.29             | 0.5715 | 659  |
| 4       | SCA    | 16               | 1.33             | 0.0291 | 1.61             | 0.6949 | 674  |
| 4       | SCA    | 17               | 1.55             | 0.0304 | 1.80             | 0.7416 | 620  |
| 4       | SCA    | 18               | 1.93             | 0.0345 | 1.89             | 0.8301 | 418  |
| 4       | SCA    | 19               | 2.21             | 0.0438 | 2.02             | 0.9062 | 259  |
| 4       | SCA    | 20               | 2.39             | 0.0516 | 2.00             | 0.8059 | 195  |
| 4       | SCA    | 21               | 2.75             | 0.0684 | 2.25             | 0.7063 | 118  |
| 4       | SCA    | 22               | 2.83             | 0.0908 | 2.29             | 0.6    | 68   |
| 4       | SCA    | 23               | 3.44             | 0.1391 | 3.00             | 0.7071 | 25   |
| 4       | SCA    | 24               |                  |        |                  |        |      |
| 4       | SCA    | 25               |                  |        |                  |        |      |
| 4       | SCA    | 26               |                  |        |                  |        |      |
| 4       | CCA    | 10               | 0.00             | 0.1506 | 0.00             | 0      | 19   |
| 4       | CCA    | 11               | 0.05             | 0.1088 | 0.11             | 0.3148 | 37   |
| 4       | CCA    | 12               | 0.37             | 0.1057 | 0.51             | 0.5064 | 39   |
| 4       | CCA    | 13               | 0.64             | 0.0575 | 0.86             | 0.3501 | 148  |
| 4       | CCA    | 14               | 0.81             | 0.0363 | 1.02             | 0.2656 | 465  |
| 4       | CCA    | 15               | 0.99             | 0.0284 | 1.18             | 0.4598 | 988  |
| 4       | CCA    | 16               | 1.28             | 0.0272 | 1.49             | 0.6489 | 1112 |
| 4       | CCA    | 17               | 1.58             | 0.0282 | 1.80             | 0.674  | 941  |
| 4       | CCA    | 18               | 1.87             | 0.0308 | 2.02             | 0.6066 | 837  |
| 4       | CCA    | 19               | 2.27             | 0.0348 | 2.44             | 0.6573 | 713  |
| 4       | CCA    | 20               | 2.69             | 0.0443 | 2.84             | 0.7473 | 300  |
| 4       | CCA    | 21               | 3.10             | 0.0481 | 3.12             | 0.7468 | 239  |
| 4       | CCA    | 22               | 3.47             | 0.0574 | 3.45             | 0.9342 | 155  |

|         |      | Model Estimation |                  |        | Observed Values  |        |     |
|---------|------|------------------|------------------|--------|------------------|--------|-----|
| Quarter | Area | Length (cm)      | Mean Age (years) | SE     | Mean Age (years) | sd     | N   |
| 4       | CCA  | 23               | 4.22             | 0.0800 | 4.22             | 1.0906 | 72  |
| 4       | CCA  | 24               | 4.41             | 0.1041 | 4.39             | 0.9186 | 41  |
| 4       | CCA  | 25               | 5.25             | 0.1889 | 5.25             | 1.0553 | 12  |
| 4       | CCA  | 26               |                  |        |                  |        |     |
| 4       | ORWA | 10               |                  |        |                  |        |     |
| 4       | ORWA | 11               |                  |        |                  |        |     |
| 4       | ORWA | 12               |                  |        |                  |        |     |
| 4       | ORWA | 13               | 1.11             | 0.1754 | 1.00             | 0      | 14  |
| 4       | ORWA | 14               | 1.33             | 0.1180 | 1.22             | 0.6082 | 32  |
| 4       | ORWA | 15               | 1.72             | 0.1117 | 1.61             | 0.8711 | 36  |
| 4       | ORWA | 16               | 1.45             | 0.1437 | 1.43             | 0.6761 | 21  |
| 4       | ORWA | 17               | 1.83             | 0.0779 | 1.96             | 0.9722 | 76  |
| 4       | ORWA | 18               | 2.08             | 0.0717 | 2.09             | 1.0938 | 89  |
| 4       | ORWA | 19               | 2.59             | 0.0766 | 2.52             | 0.9949 | 77  |
| 4       | ORWA | 20               | 3.40             | 0.0808 | 3.25             | 1.2296 | 69  |
| 4       | ORWA | 21               | 4.31             | 0.0619 | 4.08             | 1.2896 | 128 |
| 4       | ORWA | 22               | 4.88             | 0.0554 | 4.63             | 1.4505 | 168 |
| 4       | ORWA | 23               | 5.75             | 0.0793 | 5.51             | 1.9012 | 73  |
| 4       | ORWA | 24               | 6.04             | 0.1315 | 5.84             | 2.4947 | 25  |
| 4       | ORWA | 25               |                  |        |                  |        |     |
| 4       | ORWA | 26               |                  |        |                  |        |     |

Empirical mean age-at-length and standard deviation along with model estimated mean age and standard error are given. Length bins with 10 or fewer fish were not included in the analysis.
